# Supplementary material for: ATM gene polymorphisms are associated with poor prognosis of non-small cell lung cancer receiving radiation therapy
Source: publisher site journal article supplement (doi:10.18632/aging.103094), 2020-04-24
Supplement: Supplementary file [file aging-v12i8-103094-supplementary-material-SD1.pdf]

## SUPPLEMENTARY FIGURE

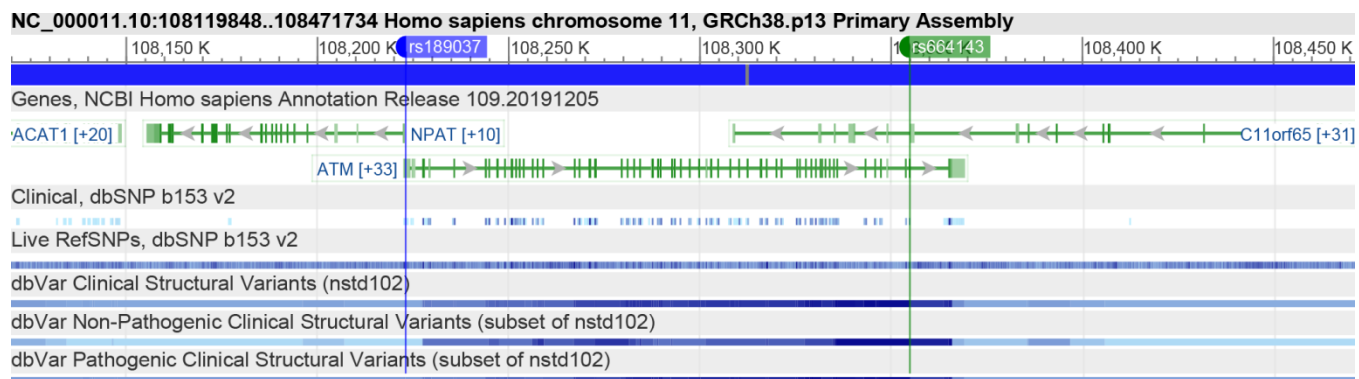

Supplementary Figure 1. Clinical structural variants of rs664143 and rs189037.
